# Supplementary material for: SMArtCARE - A platform to collect real-life outcome data of patients with spinal muscular atrophy
Source: Springer Nature journal article supplement (doi:10.1186/s13023-019-0998-4), 2019-01-21
Supplement: MOESM1 [file 16409358]

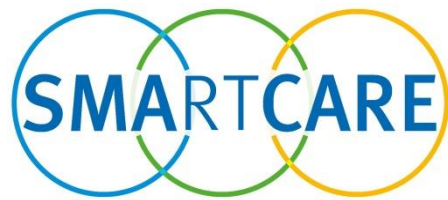

## Data items SMARtCARE

|  | Data items | Answers | If yes: |  | Comments |
|--|------------|---------|---------|--|----------|
|--|------------|---------|---------|--|----------|

### Enrolment

|                  |                               |                                                      |  |  |                              |
|------------------|-------------------------------|------------------------------------------------------|--|--|------------------------------|
| <b>Enrolment</b> | Date enrolled                 |                                                      |  |  | automatically generated      |
|                  | Date of consent               |                                                      |  |  |                              |
|                  | Genetically proven 5q SMA     |                                                      |  |  |                              |
|                  | First name                    |                                                      |  |  |                              |
|                  | Last name                     |                                                      |  |  |                              |
|                  | Last name at birth            |                                                      |  |  |                              |
|                  | Date of birth                 |                                                      |  |  |                              |
|                  | Country of birth              |                                                      |  |  |                              |
|                  | City of birth                 |                                                      |  |  |                              |
|                  | Country of residence          | Austria<br>Germany<br>Switzerland<br>Other (specify) |  |  |                              |
|                  | Patient identification number |                                                      |  |  | internal hospital patient ID |
|                  | Email address                 |                                                      |  |  |                              |
|                  | Gender                        | Male<br>Female<br>Undifferentiated<br>Unknown        |  |  |                              |

## Baseline

|                            |                                                                                                    |                                                                             |                                    |                                                                                                                                                   |                                                            |
|----------------------------|----------------------------------------------------------------------------------------------------|-----------------------------------------------------------------------------|------------------------------------|---------------------------------------------------------------------------------------------------------------------------------------------------|------------------------------------------------------------|
| <b>Genetic Test Result</b> | Do you have a copy of the genetic report?                                                          | Yes<br>No                                                                   | Date of genetic report             |                                                                                                                                                   |                                                            |
|                            |                                                                                                    |                                                                             | Name of genetic institute          |                                                                                                                                                   |                                                            |
|                            |                                                                                                    |                                                                             | Type of mutation                   | Homozygous deletion involving exon 7 of SMN1<br>Heterozygous deletion and heterozygous point mutation (compound heterozygotes)<br>Other (specify) |                                                            |
|                            | SMN2 copy number performed?                                                                        | Yes<br>No                                                                   | SMN2 copy number                   | 1, 2, 3, 4, 5, 6, 7, 8<br>other (specify)                                                                                                         |                                                            |
|                            |                                                                                                    |                                                                             | Molecular testing approach of SMN2 | MLPA<br>Sequence analysis<br>Other (specify)                                                                                                      |                                                            |
|                            | Was diagnosis made pre-symptomatically?                                                            | Yes<br>No                                                                   | Screening type                     | Newborn screening<br>Positive family history<br>Other (specify)                                                                                   |                                                            |
|                            | Any other family member affected?                                                                  | Yes<br>No<br>Unknown                                                        |                                    |                                                                                                                                                   | Kinship as auto-complete                                   |
|                            |                                                                                                    |                                                                             |                                    |                                                                                                                                                   |                                                            |
| <b>Clinical diagnosis</b>  | First symptoms or signs leading to suspect SMA. Please specify.                                    |                                                                             |                                    |                                                                                                                                                   |                                                            |
|                            | Age at symptom onset                                                                               | Prenatal<br>At birth<br>Within the first 4 weeks<br>At the age of (specify) |                                    |                                                                                                                                                   |                                                            |
|                            | Sitting without support<br>Crawl on hands and knees<br>Standing without support<br>Walking without | Never able<br>Gained<br>Gained and lost                                     | Age gained<br>Age lost             |                                                                                                                                                   | Crawl on hands on knees only in patients < 18 years of age |

|                                    |                                                                          |                                                                            |                                           |                                                |                                                  |
|------------------------------------|--------------------------------------------------------------------------|----------------------------------------------------------------------------|-------------------------------------------|------------------------------------------------|--------------------------------------------------|
|                                    | support<br>Climb stairs                                                  |                                                                            |                                           |                                                |                                                  |
|                                    | Wheelchair use?                                                          | No<br>Part-time<br>Full-time                                               | Start date of wheelchair use              |                                                | Wheelchair use only in patients > 2 years of age |
|                                    | Does the patient receive ventilator support?                             | Yes<br>No                                                                  | Type of ventilator support                | Non-invasive<br>Invasive                       |                                                  |
|                                    |                                                                          |                                                                            |                                           | Start date of ventilator support               |                                                  |
|                                    | Does the patient use a gastric or nasal feeding tube?                    | Yes – supplementary e.g. for fluids<br>Yes - exclusively fed by tube<br>No | Start date of tube feeding                |                                                |                                                  |
|                                    | Scoliosis surgery?                                                       | Yes<br>No                                                                  | Date of surgery                           |                                                |                                                  |
|                                    |                                                                          |                                                                            | Surgery technique                         | Arthrodesis<br>Growing rods<br>Other (specify) |                                                  |
|                                    | Any other pre-existing illness?                                          | Yes<br>No<br>Unknown                                                       | Add pre-existing illness                  |                                                | ICD 10 code                                      |
|                                    |                                                                          |                                                                            |                                           |                                                |                                                  |
| <b>Registries, clinical trials</b> | Is the patient currently or was previously included in a clinical trial? | Yes<br>No                                                                  | Currently included<br>Previously included |                                                |                                                  |
|                                    |                                                                          |                                                                            | Name of trial                             |                                                |                                                  |
|                                    |                                                                          |                                                                            | Name of drug                              |                                                |                                                  |
|                                    |                                                                          |                                                                            | Start date                                |                                                |                                                  |
|                                    |                                                                          |                                                                            | End date                                  |                                                |                                                  |
|                                    | Is the patient currently enrolled in other registries?                   | Yes<br>No<br>Unknown                                                       | Specify                                   |                                                |                                                  |

## Medical Assessment

|                  |                                                           |           |                                                                           |                                                                                                                                     |                                        |
|------------------|-----------------------------------------------------------|-----------|---------------------------------------------------------------------------|-------------------------------------------------------------------------------------------------------------------------------------|----------------------------------------|
|                  | Visit date                                                |           |                                                                           |                                                                                                                                     |                                        |
|                  | Age at visit                                              |           |                                                                           |                                                                                                                                     | automatically filled, years and months |
|                  | Physician's first name                                    |           |                                                                           |                                                                                                                                     |                                        |
|                  | Physician's last name                                     |           |                                                                           |                                                                                                                                     |                                        |
|                  |                                                           |           |                                                                           |                                                                                                                                     |                                        |
| <b>Pulmonary</b> | Does the patient receive ventilator support?              | Yes<br>No | Type of ventilation                                                       | Non-invasive<br>Invasive                                                                                                            |                                        |
|                  |                                                           |           |                                                                           | Date of change                                                                                                                      |                                        |
|                  |                                                           |           | Frequency of use                                                          | Daily use<br>Occasional use<br>Use when ill only                                                                                    |                                        |
|                  |                                                           |           | Time of ventilator use                                                    | Night (during sleep)<br>Intermittent day time and continuous at night<br>Continuous (>16h/day)<br>Intermittent with acute illnesses |                                        |
|                  |                                                           |           | Hours per day                                                             | 1-24                                                                                                                                |                                        |
|                  |                                                           |           | Start of ventilator use (date)<br>Ongoing<br>End of ventilator use (date) |                                                                                                                                     |                                        |
|                  | Assistance in airway clearance and secretion mobilisation | Yes<br>No | Type of airway clearance and secretion mobilisation                       | Suction<br>Chest physiotherapy<br>Cough assist device<br>Other (specify)                                                            |                                        |
|                  |                                                           |           | Frequency of use                                                          | Daily use<br>Occasional use<br>Use when ill only                                                                                    |                                        |
|                  | Pulmonary function performed?                             | Yes<br>No | Date of pulmonary function                                                |                                                                                                                                     |                                        |
|                  |                                                           |           | FVC percentage                                                            |                                                                                                                                     |                                        |

|                        |                                                       |                                                                            |                                                                       |                                                                   |                                  |
|------------------------|-------------------------------------------------------|----------------------------------------------------------------------------|-----------------------------------------------------------------------|-------------------------------------------------------------------|----------------------------------|
|                        |                                                       |                                                                            | FVC litre                                                             |                                                                   |                                  |
|                        |                                                       |                                                                            | Peak cough flow                                                       |                                                                   |                                  |
|                        | Vaccination performed?                                | Yes<br>No                                                                  | RSV                                                                   | Date of last vaccination                                          |                                  |
|                        |                                                       |                                                                            | Influenza                                                             | Date of vaccination                                               |                                  |
|                        |                                                       |                                                                            | Pneumococcus                                                          | Date of vaccination                                               |                                  |
|                        |                                                       |                                                                            |                                                                       |                                                                   |                                  |
| <b>Nutrition</b>       | Does the patient use a gastric or nasal feeding tube? | No<br>Yes - exclusively fed by tube<br>Yes – supplementary e.g. for fluids | Start of tube feeding (date)<br>Ongoing<br>End of tube feeding (date) |                                                                   |                                  |
|                        | Swallowing?                                           | Normal<br>With difficulties                                                |                                                                       |                                                                   |                                  |
|                        | Chewing?                                              | Normal<br>With difficulties                                                |                                                                       |                                                                   | Only in patients > 1 year of age |
|                        |                                                       |                                                                            |                                                                       |                                                                   |                                  |
| <b>Orthopaedics</b>    | Does the patient have scoliosis?                      | Yes<br>No                                                                  | Was new x-ray performed?                                              | Yes<br>No                                                         |                                  |
|                        |                                                       |                                                                            | Date of x-ray                                                         |                                                                   |                                  |
|                        |                                                       |                                                                            | Cobb angle                                                            |                                                                   |                                  |
|                        | Orthopaedic surgery since last visit?                 | Yes<br>No                                                                  | Type of orthopaedic surgery                                           | Scoliosis surgery<br>Other types of orthopaedic surgery (specify) |                                  |
|                        |                                                       |                                                                            | Surgery technique                                                     | Arthrodesis<br>Growing rods<br>Other (specify)                    |                                  |
|                        | Does the patient suffer pain regularly?               | Yes<br>No<br>Unknown                                                       | Pain intensity                                                        | Mild<br>Moderate<br>Severe                                        |                                  |
|                        |                                                       |                                                                            | Localisation                                                          |                                                                   |                                  |
|                        | Does the patient experience fatigue?                  | Yes<br>No<br>Unknown                                                       | Specify                                                               |                                                                   |                                  |
|                        |                                                       |                                                                            |                                                                       |                                                                   |                                  |
| <b>Hospitalisation</b> | Planned hospitalisation since last visit (except for  | Yes<br>No<br>Unknown                                                       | Admission date<br>Ongoing<br>Discharge date                           |                                                                   |                                  |

|                   |                            |                                                                              |                            |                                                                                                                                                              |                                   |
|-------------------|----------------------------|------------------------------------------------------------------------------|----------------------------|--------------------------------------------------------------------------------------------------------------------------------------------------------------|-----------------------------------|
|                   | treatment administration)? |                                                                              |                            |                                                                                                                                                              |                                   |
|                   |                            |                                                                              | Reason for hospitalisation | Sleep study<br>Placement of gastric tube<br>Orthopaedic surgery<br>Other (specify)                                                                           |                                   |
|                   |                            |                                                                              |                            |                                                                                                                                                              |                                   |
| <b>Therapy</b>    | Therapy interventions?     | Physiotherapy<br>Feeding / Speech<br>Occupational Therapy<br>Other (specify) |                            |                                                                                                                                                              |                                   |
|                   | Orthoses?                  | Yes<br>No                                                                    | Type of orthoses           | Ankle-foot Orthoses (AFOs)<br>Supramalleolar Orthoses (SMO)<br>Orthotics/shoe inserts<br>Knee-ankle-foot Orthoses (KAFOs)<br>Hand splints<br>Other (specify) |                                   |
|                   |                            |                                                                              | Orthotic Type of Use       | Functional, Day time only<br>Resting Day time<br>Resting Night time                                                                                          |                                   |
|                   |                            |                                                                              | Frequency (times per week) | 1-7                                                                                                                                                          |                                   |
|                   | Devices?                   | Yes<br>No                                                                    | Type of devices            | Standing Frame<br>Positioning Device (Seating system)<br>Therapy bicycle<br>Galileo<br>Other (specify)                                                       |                                   |
|                   |                            |                                                                              | Frequency (times per week) | 1-7                                                                                                                                                          |                                   |
|                   | Wheelchair use?            | No<br>Part-time<br>Full-time                                                 | Type of wheelchair         | Manual wheelchair<br>Power wheelchair                                                                                                                        | Only in patients > 2 years of age |
|                   |                            |                                                                              | Start date                 |                                                                                                                                                              |                                   |
|                   |                            |                                                                              |                            |                                                                                                                                                              |                                   |
| <b>Medication</b> | Is the patient on any      | Yes                                                                          | Name of drug               |                                                                                                                                                              |                                   |

|                                    |                                                                                    |                                |                                      |                                                                                                                                                 |                                                             |
|------------------------------------|------------------------------------------------------------------------------------|--------------------------------|--------------------------------------|-------------------------------------------------------------------------------------------------------------------------------------------------|-------------------------------------------------------------|
|                                    | approved medication for SMA                                                        | No                             |                                      |                                                                                                                                                 |                                                             |
|                                    |                                                                                    |                                | Start date<br>Ongoing<br>End date    |                                                                                                                                                 |                                                             |
|                                    | Other medication taken on a regular basis                                          | Yes<br>No                      | Name of medication                   |                                                                                                                                                 |                                                             |
|                                    |                                                                                    |                                | Start date<br>Ongoing<br>End date    |                                                                                                                                                 |                                                             |
|                                    |                                                                                    |                                |                                      |                                                                                                                                                 |                                                             |
| <b>Clinical Trial</b>              | Is the patient currently included in a clinical trial?                             | Yes<br>No<br>Unknown           | Name of trial                        |                                                                                                                                                 |                                                             |
|                                    |                                                                                    |                                | Name of drug                         |                                                                                                                                                 |                                                             |
|                                    |                                                                                    |                                | Start date                           |                                                                                                                                                 |                                                             |
|                                    |                                                                                    |                                |                                      |                                                                                                                                                 |                                                             |
| <b>Best current motor function</b> | Any changes in motor milestones?                                                   | No<br>Improvement<br>Worsening | Best current motor function          | Sitting without support<br>Crawl on hands and knees<br>Standing without support<br>Walking without support<br>Climb stairs<br>None of the above | Crawl on hands and knees only in patients < 18 years of age |
|                                    |                                                                                    |                                | Age gained of new motor milestone    |                                                                                                                                                 |                                                             |
|                                    |                                                                                    |                                | Age loss of previous motor milestone |                                                                                                                                                 |                                                             |
| <b>Upper limb function</b>         | Achieve useful function of hands (e.g. hold a pen or pick pennies up from a table) | Yes<br>No                      |                                      |                                                                                                                                                 |                                                             |
|                                    | Raise hands to mouth (in a sitting position)                                       | Yes<br>No                      |                                      |                                                                                                                                                 |                                                             |
|                                    | Reach overhead (in a sitting position)                                             | Yes<br>No                      |                                      |                                                                                                                                                 |                                                             |

|                             |                               |                                                                                     |                                            |                                                                                                                                    |                                                          |
|-----------------------------|-------------------------------|-------------------------------------------------------------------------------------|--------------------------------------------|------------------------------------------------------------------------------------------------------------------------------------|----------------------------------------------------------|
| <b>HINE</b>                 |                               |                                                                                     |                                            |                                                                                                                                    | In patients < 12 years of age                            |
| <b>Clinical examination</b> | Height (cm)                   |                                                                                     |                                            |                                                                                                                                    | Percentile auto-calculated in patients < 18 years of age |
|                             | Body weight (kg)              |                                                                                     |                                            |                                                                                                                                    | Percentile auto-calculated in patients < 18 years of age |
|                             | Head circumference (cm)       |                                                                                     |                                            |                                                                                                                                    | Percentile auto-calculated in patients < 3 years of age  |
|                             | BMI                           |                                                                                     |                                            |                                                                                                                                    | Auto-calculated                                          |
|                             | Skin                          | Normal<br>Abnormal<br>Not examined                                                  | Specify                                    |                                                                                                                                    |                                                          |
|                             | HEENT                         | Normal<br>Abnormal<br>Not examined                                                  | Specify                                    |                                                                                                                                    |                                                          |
|                             | Pulmo                         | Normal<br>Abnormal<br>Not examined                                                  | Specify                                    |                                                                                                                                    |                                                          |
|                             | Heart                         | Normal<br>Abnormal<br>Not examined                                                  | Specify                                    |                                                                                                                                    |                                                          |
|                             | Abdomen                       | Normal<br>Abnormal<br>Not examined                                                  | Specify                                    |                                                                                                                                    |                                                          |
|                             | Neurology                     | Symptoms related to SMA<br>Neurological findings not related to SMA<br>Not examined | Specify                                    |                                                                                                                                    |                                                          |
|                             | Are any contractures present? | Yes<br>No                                                                           | Type of limitation                         | Minimal (no limitations to function)<br>Moderate (some limitations, adaptations necessary)<br>Severe (imposing limits to function) |                                                          |
|                             |                               |                                                                                     | Description of contractures / localisation |                                                                                                                                    |                                                          |



| <b>Laboratory</b>                     | Laboratory testing performed?         | Yes<br>No                                                                          | Any abnormalities of clinical significance? | Yes (specify)<br>No |                                                                                                                                                                                                                                                                                             |
|---------------------------------------|---------------------------------------|------------------------------------------------------------------------------------|---------------------------------------------|---------------------|---------------------------------------------------------------------------------------------------------------------------------------------------------------------------------------------------------------------------------------------------------------------------------------------|
| <b>Neuro-physiology</b><br>(optional) | Motor nerve conduction velocity (m/s) | Ulnar<br>Median<br>Tibialis                                                        |                                             |                     |                                                                                                                                                                                                                                                                                             |
|                                       | F-wave latency (ms)                   | Ulnar<br>Median<br>Tibialis                                                        |                                             |                     |                                                                                                                                                                                                                                                                                             |
|                                       | CMAP amplitude (mV)                   | Ulnar<br>Median<br>Tibialis                                                        |                                             |                     |                                                                                                                                                                                                                                                                                             |
| <b>PROM</b>                           | General impression                    | Much improved<br>Minimally improved<br>No changes<br>Minimally worse<br>Much worse | Specify                                     |                     | In patients > 12 years of age: description of the impression in comparison to 12 months ago.<br>In patients <=12 years of age: description of the impression in comparison to 6 months ago.<br>In patients < 12 months of age: description of the impression in comparison to 3 months ago. |
|                                       | Motor function                        | Much improved<br>Minimally improved<br>No changes<br>Minimally worse<br>Much worse | Specify                                     |                     |                                                                                                                                                                                                                                                                                             |
|                                       | Respiratory function                  | Much improved<br>Minimally improved<br>No changes<br>Minimally worse<br>Much worse | Specify                                     |                     |                                                                                                                                                                                                                                                                                             |

## Adverse Events

|                       |                                                        |           |                                                             |                                                                                                                       |                                                                                                                                |
|-----------------------|--------------------------------------------------------|-----------|-------------------------------------------------------------|-----------------------------------------------------------------------------------------------------------------------|--------------------------------------------------------------------------------------------------------------------------------|
| <b>Adverse events</b> | Date recorded                                          |           |                                                             |                                                                                                                       | automatically generated                                                                                                        |
|                       | Has there been any adverse event since the last visit? | Yes<br>No |                                                             |                                                                                                                       |                                                                                                                                |
|                       | Has there been unplanned or prolonged hospitalisation? | Yes<br>No | Type of unexpected event                                    | Respiratory tract infection<br>Hydrocephalus<br>Epileptic seizure<br>Post lumbar puncture syndrome<br>Other (specify) |                                                                                                                                |
|                       |                                                        |           | Medra code of acute event                                   |                                                                                                                       |                                                                                                                                |
|                       |                                                        |           | Description of acute event                                  |                                                                                                                       |                                                                                                                                |
|                       |                                                        |           | Admission date<br>Ongoing<br>Discharge date                 |                                                                                                                       |                                                                                                                                |
|                       |                                                        |           | Drug treatment for post lumbar puncture syndrome necessary? | Yes<br>No<br>Unknown                                                                                                  |                                                                                                                                |
|                       |                                                        |           | Type of drug treatment for post lumbar puncture syndrome    | Analgesics<br>Caffeine<br>Other (specify)                                                                             |                                                                                                                                |
|                       |                                                        |           | Is the adverse event related to drug treatment?             | No<br>Possibly<br>Yes                                                                                                 | If "possibly" or "yes":<br>Generation of a standardized form to report drug related adverse events to the respective authority |
|                       |                                                        |           | Name of drug                                                |                                                                                                                       |                                                                                                                                |
|                       | Any unexpected events without hospitalisation?         | Yes<br>No | Type of unexpected event                                    | Respiratory tract infection<br>Hydrocephalus<br>Epileptic seizure<br>Post lumbar puncture syndrome<br>Other (specify) |                                                                                                                                |

|  |  |  |                                                          |                                                             |                                                                                                                                |
|--|--|--|----------------------------------------------------------|-------------------------------------------------------------|--------------------------------------------------------------------------------------------------------------------------------|
|  |  |  | Medra code of acute event                                |                                                             |                                                                                                                                |
|  |  |  | Description of acute event                               |                                                             |                                                                                                                                |
|  |  |  | Start date<br>Ongoing<br>End date                        |                                                             |                                                                                                                                |
|  |  |  | Post lumbar puncture syndrome?                           | Drug treatment for post lumbar puncture syndrome necessary? |                                                                                                                                |
|  |  |  | Type of drug treatment for post lumbar puncture syndrome | Analgesics<br>Caffeine<br>Other (specify)                   |                                                                                                                                |
|  |  |  | Is the adverse event related to drug treatment?          | No<br>Possibly<br>Yes                                       | If "possibly" or "yes":<br>Generation of a standardized form to report drug related adverse events to the respective authority |
|  |  |  | Name of drug                                             |                                                             |                                                                                                                                |

### Nusinersen

|                   |                              |                                                 |                            |                                                         |  |
|-------------------|------------------------------|-------------------------------------------------|----------------------------|---------------------------------------------------------|--|
| <b>Nusinersen</b> | Date of treatment            |                                                 |                            |                                                         |  |
|                   | Care Setting                 | Outpatient<br>Inpatient (overnight)             |                            |                                                         |  |
|                   | Ventilator support during LP | Yes<br>No                                       | Type of ventilator support | General anaesthesia<br>Patient's ventilator device      |  |
|                   | Anaesthesia or sedation      | Yes<br>No                                       | Drug                       |                                                         |  |
|                   |                              |                                                 | Application                | Intranasal<br>Intravenous<br>Peroral<br>Other (specify) |  |
|                   | Use of                       | Ultrasound<br>Fluoroscopy/radioscopy<br>CT-Scan | Radiation dose of CT scan  |                                                         |  |

|  |                                 |                 |         |  |  |
|--|---------------------------------|-----------------|---------|--|--|
|  |                                 | Other (specify) |         |  |  |
|  | Duration of procedure           |                 |         |  |  |
|  | Adverse events during procedure | Yes<br>No       | Specify |  |  |

### End of data collection

|                               |                                         |           |                |  |                         |
|-------------------------------|-----------------------------------------|-----------|----------------|--|-------------------------|
| <b>End of data collection</b> | Date recorded                           |           |                |  | automatically generated |
|                               | Has the patient withdrawn the consent?  | Yes<br>No |                |  |                         |
|                               | Is the patient deceased?                | Yes<br>No | Date of death  |  |                         |
|                               |                                         |           | Cause of death |  | ICD 10 code             |
|                               | Other reason for end of data collection |           |                |  |                         |
